# Supplementary material for: Post-ultrasonic irradiation time is important in initiating citrate-coated α-Fe2O3 nanorod formation
Source: Royal Society of Chemistry journal article supplement (doi:10.1039/c3ra41593g), 2013-01-01
Supplement: c3ra41593g.pdf [file c3ra41593g.pdf]

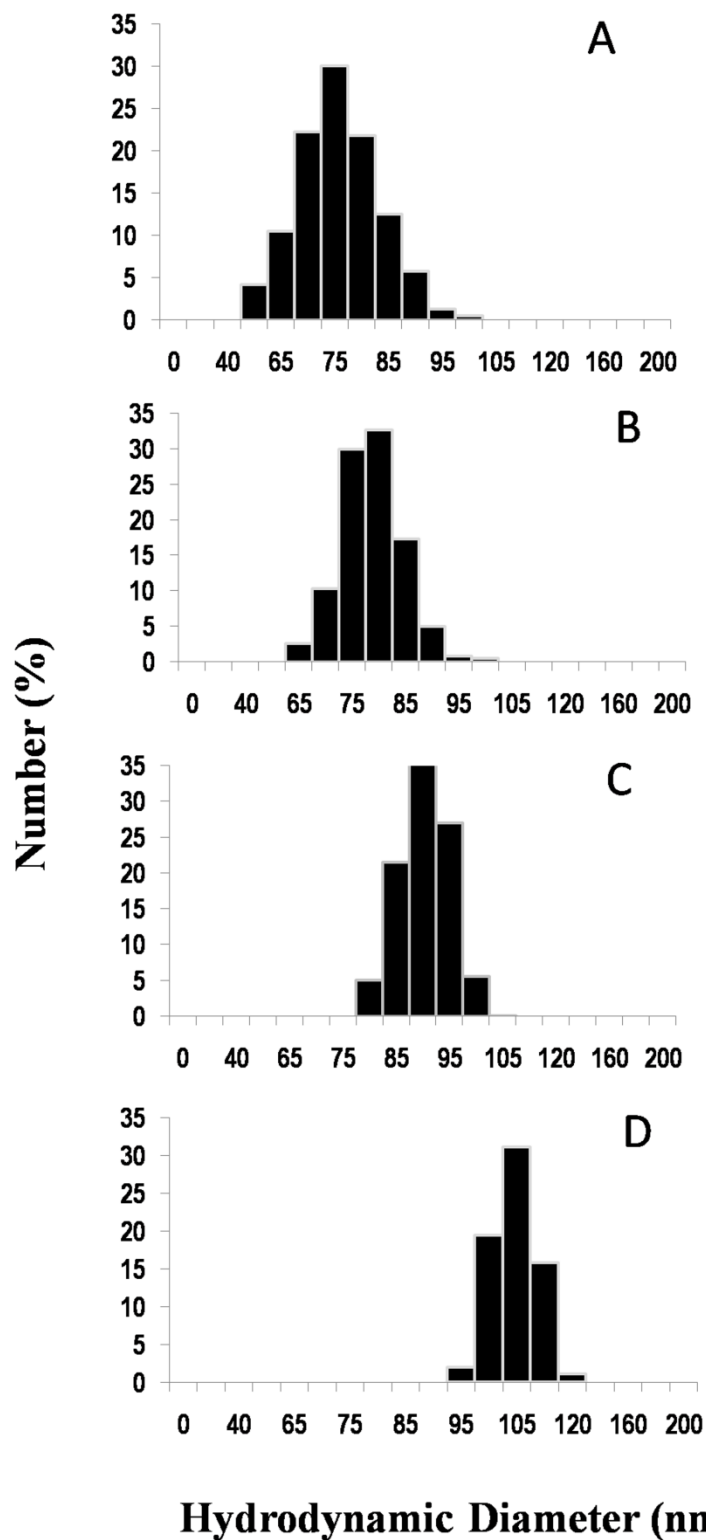

**Fig S1: Hydrodynamic diameter of the nanomaterials synthesized after incubation for (A) 0 hours (B) 2 hours (C) 4 hours (D) 8 hours. Ultrasonic irradiation was done for 5 min at 44 W.**
